# Supplementary material
Source: PubMed Central journal article supplement (PMC5392765)
Supplement: ml7b00066_si_001.pdf [file ml7b00066_si_001.pdf]

## Supplemental Information for

Norbenzomorphan Scaffold: Chemical Tool for Modulating Sigma Receptor-Subtype Selectivity

James J. Sahn, Timothy R. Hodges, Jessica Z. Chan, and Stephen F. Martin

**General.** Toluene was dried by filtration through one column of activated, neutral alumina followed by one column of Q5 reactant<sup>1</sup> and was determined to have less than 50 ppm H<sub>2</sub>O by Karl Fischer coulometric moisture analysis. Methanol (MeOH), methylene chloride (CH<sub>2</sub>Cl<sub>2</sub>), 1,2-dichloroethane (DCE), triethylamine (Et<sub>3</sub>N) and diisopropylethylamine (*i*-Pr<sub>2</sub>NEt) were used without further purification. All reagents were reagent grade and used without purification unless otherwise noted. All reactions involving air or moisture sensitive reagents or intermediates were performed under an inert atmosphere of nitrogen or argon in glassware that was flame or oven dried. Reaction temperatures refer to the temperature of the cooling/heating bath. Volatile solvents were removed under reduced pressure using a Büchi rotary evaporator at 20–30 °C (bath temperature). Thin layer chromatography was run on pre-coated plates of silica gel with a 0.25 mm thickness containing 60F-254 indicator (EMD Millipore). Chromatography was performed using forced flow (flash chromatography) and the indicated solvent system on 230-400 mesh silica gel (Silicycle flash F60) according to the method of Still,<sup>2</sup> unless otherwise noted. Radial Preparative Liquid Chromatography (radial plc) was performed on a Chromatotron<sup>®</sup> using glass plates coated with Merck, TLC grade 7749 silica gel with gypsum binder and fluorescent indicator.

Proton nuclear magnetic resonance (<sup>1</sup>H NMR) and carbon nuclear magnetic resonance (<sup>13</sup>C NMR) spectra were obtained at the indicated field as solutions in CDCl<sub>3</sub> unless otherwise indicated. Chemical shifts are referenced to the deuterated solvent (e.g., for CDCl<sub>3</sub>, δ = 7.26 ppm and 77.0 ppm for <sup>1</sup>H and <sup>13</sup>C NMR, respectively) and are reported in parts per million (ppm, δ) relative to tetramethylsilane (TMS, δ = 0.00 ppm). Coupling constants (*J*) are reported in Hz and the splitting abbreviations used are: s, singlet; d, doublet; t, triplet; q, quartet; m, multiplet; comp, overlapping multiplets of magnetically nonequivalent protons; br, broad; app, apparent. Molecular mass was determined using an LCMS system comprised of an Agilent 1200 Series HPLC and an Agilent 6130 single quadrupole mass spectrometer. Samples were injected onto a Phenomenex Gemini C18 column (5 micron, 2.1 x 50 mm) and eluted at 0.7 ml/min using a gradient of 10-90% acetonitrile, 0.1% formic acid (11 minute linear ramp). Positive mode electrospray ionization ESI was used to verify the identity of the major component. All compounds submitted for testing at PDSP were >95% purity as determined by LC via AUC at 214- and 254 nm. Experimental and/or characterization data for **5-7**,<sup>3</sup> **35**, **36**, **22**,<sup>4</sup> **33**, **34**, and **38** have been reported previously.

### General Procedure A: Cross coupling of piperazine with aryl chlorides **5** and **6**:

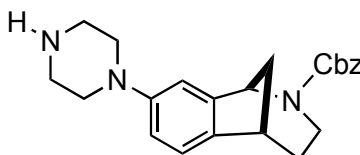

**8**

**(±)-Benzyl-8-(piperazin-1-yl)-1,3,4,5-tetrahydro-2H-1,5-methanobenzo[*c*]azepine-2-carboxylate (8):** A solution of **6** (208 mg, 0.63 mmol), NaOtBu (85 mg, 0.88 mmol) and piperazine (3.18 mmol, 274 mg) in degassed toluene (1.7 mL) was stirred until the mixture became homogenous (ca. 5 min). A freshly prepared Pd(OAc)<sub>2</sub> (0.031 mmol, 7.0 mg) and JohnPhos<sup>®</sup> (di-*tert*-butylphosphine biphenyl) (0.031 mmol, 9.4 mg) solution in toluene (0.31 mL) that had been stirred for 20 min, was added to the reaction mixture via syringe. The reaction was heated at 100 °C for 1 ¾ h. The reaction was cooled to room temperature and poured into water (10 mL), and the mixture was extracted with CH<sub>2</sub>Cl<sub>2</sub> (3 x 25 mL). The combined organic extracts were dried (K<sub>2</sub>CO<sub>3</sub>) and filtered through a pad of

Celite<sup>®</sup> (filter cake was rinsed with EtOAc (2 x 10 mL). The combined filtrate and washings were concentrated under reduced pressure, and the residue was purified via radial plc (SiO<sub>2</sub>), eluting with EtOAc/hexanes (5% v/v → 15% v/v → 30% v/v) to give 170 mg (72%) of **8** as a light yellow foam: <sup>1</sup>H NMR (400 MHz, CDCl<sub>3</sub>, as a mixture of rotamers) δ 7.45-7.26 (comp, 5 H), 7.10 (d, *J* = 8.3 Hz, 1 H), 6.97 (br s, 0.6 H), 6.79 (app dd, *J* = 8.3, 2.0 Hz, 1.4 H), 5.45 (br s, 0.6 H), 5.34 (br s, 0.4 H), 5.26-5.06 (comp, 2 H), 3.86-3.74 (m, 1 H), 3.45 (br s, 1 H), 3.20-2.96 (comp, 8 H), 2.80-2.66 (m, 1 H), 2.52-2.37 (m, 1 H), 2.24-2.11 (m, 1 H), 2.02-1.88 (m, 1 H), 1.84 (d, *J* = 10.8 Hz, 1 H), 1.62-1.48 (m, 1 H); <sup>13</sup>C NMR (75 MHz) δ (rotamers) 155.3, 155.1, 151.9, 151.6, 142.4, 142.1, 137.8, 137.6, 137.4, 137.2, 128.7, 128.2, 128.1, 123.3, 116.4, 116.1, 112.6, 112.4, 78.8, 77.7, 67.1, 58.3, 58.0, 51.3, 50.4, 48.6, 46.5, 44.0, 39.2, 38.9, 30.7; IR (neat) 2942, 2825, 1692, 1417, 1231, 1101 cm<sup>-1</sup>; HRMS (ESI) *m/z* calcd for C<sub>23</sub>H<sub>28</sub>N<sub>3</sub>O<sub>2</sub> (M+H)<sup>+</sup>, 378.2176; found 378.2176.

**General Procedure B: Reductive alkylation of arylpiperazines 7 and 8:**

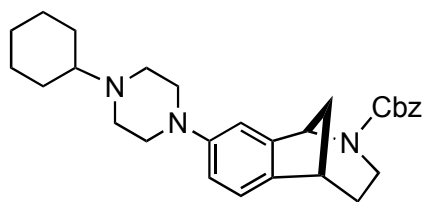

**28**

**(±)-Benzyl-8-(4-cyclohexylpiperazin-1-yl)-1,3,4,5-tetrahydro-2H-1,5-methanobenzo[c]azepine-2-carboxylate (28).** Cyclohexanone (23 mg, 25 μL, 0.237 mmol) was added to a stirred mixture of sodium triacetoxyborohydride (34 mg, 0.159 mmol) and **8** (30 mg, 0.079 mmol) in DCE (1 mL) at room temp. The mixture was stirred for 3 h and then poured into brine (10 mL). The mixture was extracted with Et<sub>2</sub>O (3x10 mL), and the combined organic extracts were dried (MgSO<sub>4</sub>) and concentrated under reduced pressure. The residue was purified via flash column chromatography (SiO<sub>2</sub>), eluting with MeOH/CH<sub>2</sub>Cl<sub>2</sub> (2%), to afford 34 mg (94%) of **28** as a colorless oil: <sup>1</sup>H NMR (400 MHz, CDCl<sub>3</sub>, as a mixture of rotamers) δ 7.47-7.26 (comp, 5 H), 7.10 (d, *J* = 8.2 Hz, 1 H), 6.97 (br s, 0.55 H), 6.81 (app dd, *J* = 8.2, 2.0 Hz, 1.45 H), 5.45 (br s, 0.55 H), 5.34 (br s, 0.45 H), 5.26-5.04 (comp, 2 H), 3.88-3.71 (m, 1 H), 3.28-3.12 (comp, 5 H), 2.80 (br s, 4 H), 2.52-2.35 (comp, 2 H), 2.25-2.10 (m, 1 H), 1.96 (br s, 3 H), 1.84 (app d, *J* = 7.8 Hz, 3 H), 1.66 (d, *J* = 12.0 Hz, 1 H), 1.63-1.48 (m, 1 H), 1.35-1.08 (comp, 5 H); <sup>13</sup>C NMR (125 MHz, CDCl<sub>3</sub>, as a mixture of rotamers) δ 155.2, 154.9, 151.1, 142.3, 142.0, 137.8, 137.3, 137.0, 128.6, 128.6, 128.0, 127.9, 123.2, 123.1, 116.2, 115.8, 112.6, 112.4, 67.0, 63.8, 58.2, 57.9, 50.0, 49.1, 43.9, 39.1, 38.8, 30.6, 28.9, 26.3, 25.9; IR (neat): 2930, 2853, 1696, 1418, 1238 cm<sup>-1</sup>; HRMS (ESI) *m/z* calcd for C<sub>29</sub>H<sub>38</sub>N<sub>3</sub>O<sub>2</sub> (M+H)<sup>+</sup>, 460.2959; found 460.2960.

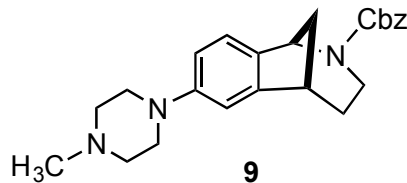

**9**

**(±)-Benzyl-7-(4-methylpiperazin-1-yl)-1,3,4,5-tetrahydro-2H-1,5-methanobenzo[c]azepine-2-carboxylate (9):** From **7** and paraformaldehyde following general procedure B, 99%, colorless oil: <sup>1</sup>H

NMR (400 MHz, CDCl<sub>3</sub>, as a mixture of rotamers)  $\delta$  7.47-7.27 (comp, 5 H), 7.21 (d,  $J$  = 7.1 Hz, 0.5 H), 7.09 (d,  $J$  = 7.1 Hz, 0.5 H), 6.84 (d,  $J$  = 2.1 Hz, 1 H), 6.78-6.71 (m, 1 H), 5.43 (br s, 0.5 H), 5.33 (br s, 0.5 H), 5.24-5.05 (comp, 2 H), 3.87-3.72 (m, 1 H), 3.26-3.16 (comp, 5 H), 2.59 (t,  $J$  = 5.1 Hz, 4 H), 2.53-2.38 (m, 1 H), 2.36 (s, 3 H), 2.53-2.09 (m, 1 H), 2.04-1.87 (m, 1 H), 1.84 (d,  $J$  = 8.6 Hz, 1 H), 1.64-1.48 (m, 1 H); <sup>13</sup>C NMR (100 MHz, CDCl<sub>3</sub>, as a mixture of rotamers)  $\delta$  155.0, 154.8, 151.9, 147.7, 137.2, 137.0, 135.4, 132.5, 132.2, 128.6, 128.0, 127.9, 124.4, 124.3, 114.6, 111.0, 67.0, 57.2, 57.0, 55.2, 49.5, 46.1, 44.1, 40.3, 38.6, 30.5; IR (neat): 2936, 1694, 1418, 1238 cm<sup>-1</sup>. HRMS (ESI)  $m/z$  calcd for C<sub>24</sub>H<sub>30</sub>N<sub>3</sub>O<sub>2</sub> (M+H)<sup>+</sup>, 392.2333; found 392.2333.

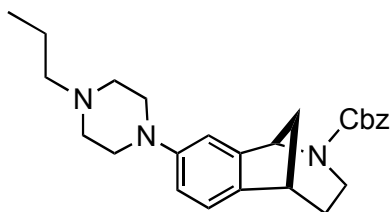

**23**

**(±)-Benzyl-8-(4-propylpiperazin-1-yl)-1,3,4,5-tetrahydro-2H-1,5-methanobenzo[c]azepine-2-carboxylate (23)**: From **8** and propionaldehyde following general procedure B, 75%, colorless oil: <sup>1</sup>H NMR (400 MHz, CDCl<sub>3</sub>, as a mixture of rotamers)  $\delta$  7.47-7.26 (comp, 5 H), 7.10 (d,  $J$  = 8.3 Hz, 1 H), 6.98 (br s, 0.5 H), 6.85-6.77 (comp, 1.5 H), 5.45 (br s, 0.5 H), 5.34 (br s, 0.5 H), 5.27-5.03 (comp, 2 H), 3.88-3.70 (m, 1 H), 3.27-3.09 (comp, 5 H), 2.67-2.56 (m, 4 H), 2.52-2.34 (m, 1 H), 2.37 (t,  $J$  = 7.6 Hz, 2 H), 2.24 (m, 1 H), 2.02-1.87 (m, 1 H), 1.84 (d,  $J$  = 10.5 Hz, 1 H), 1.62-1.47 (m, 1 H), 1.56 (sext, 7.5 Hz, 2 H), 0.93 (t,  $J$  = 7.4 Hz, 3 H); <sup>13</sup>C NMR (100 MHz, CDCl<sub>3</sub>, as a mixture of rotamers)  $\delta$  155.1, 154.8, 151.1, 142.1, 141.8, 137.5, 137.2, 136.9, 128.5, 127.9, 127.8, 123.1, 123.0, 116.0, 115.7, 112.4, 112.1, 66.9, 60.7, 58.0, 57.7, 53.3, 49.6, 43.8, 39.0, 38.7, 30.5, 20.0, 12.0; IR (neat): 2936, 1696, 1417, 1237 cm<sup>-1</sup>; HRMS (ESI)  $m/z$  calcd for C<sub>26</sub>H<sub>34</sub>N<sub>3</sub>O<sub>2</sub> (M+H)<sup>+</sup>, 420.2646; found 420.2643.

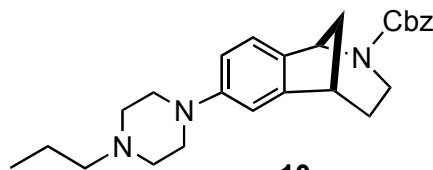

**10**

**(±)-Benzyl-7-(4-propylpiperazin-1-yl)-1,3,4,5-tetrahydro-2H-1,5-methanobenzo[c]azepine-2-carboxylate (10)**. From **7** and propionaldehyde following general procedure B, 99%, colorless oil: <sup>1</sup>H NMR (400 MHz, CDCl<sub>3</sub>, as a mixture of rotamers)  $\delta$  7.45-7.27 (comp, 5 H), 7.21 (d,  $J$  = 7.9 Hz, 0.5 H), 7.09 (d,  $J$  = 7.8 Hz, 0.5 H), 6.84 (d,  $J$  = 2.0 Hz, 1 H), 6.74 (br s, 1 H), 5.43 (brs, 0.5 H), 5.32 (br s, 0.5 H), 5.23-5.04 (comp, 2 H), 3.87-3.71 (m, 1 H), 3.28-3.13 (comp, 5 H), 2.62 (t,  $J$  = 4.9 Hz, 4 H), 2.53-2.40 (m, 1 H), 2.37 (t,  $J$  = 7.8 Hz, 2 H), 2.25-2.11 (m, 1 H), 2.05-1.88 (m, 1 H), 1.84 (d,  $J$  = 9.6 Hz, 1 H), 1.56 (sext, 7.5 Hz, 3 H), 0.93 (t,  $J$  = 7.4 Hz, 3 H); <sup>13</sup>C NMR (150 MHz, CDCl<sub>3</sub>, as a mixture of rotamers)  $\delta$  155.0, 154.9, 152.1, 147.8, 137.3, 137.1, 132.4, 132.1, 128.6, 128.0, 127.9, 124.5, 124.3, 114.6, 111.0, 67.0, 60.8, 57.3, 57.0, 53.4, 49.6, 44.1, 40.4, 38.7, 30.5, 20.1, 12.1; IR (neat): 2937, 2816, 1696, 1417, 1235 cm<sup>-1</sup>; HRMS (ESI)  $m/z$  calcd for C<sub>26</sub>H<sub>34</sub>N<sub>3</sub>O<sub>2</sub> (M+H)<sup>+</sup>, 420.2646; found 420.2646.

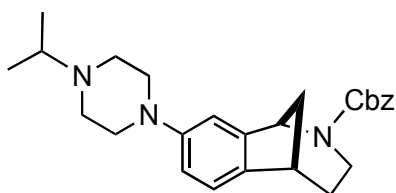

24

**(±)-Benzyl-8-(4-isopropylpiperazin-1-yl)-1,3,4,5-tetrahydro-2H-1,5-methanobenzo[c]azepine-2-carboxylate (24).** From **8** and acetone following general procedure B, 69%, colorless oil:  $^1\text{H}$  NMR (400 MHz,  $\text{CDCl}_3$ , as a mixture of rotamers)  $\delta$  7.48-7.26 (comp, 5 H), 7.10 (d,  $J = 8.2$  Hz, 1 H), 6.97 (br s, 0.5 H), 6.805 (app dd,  $J = 8.2, 2.1$  Hz, 1.5 H), 5.44 (br s, 0.5 H), 5.33 (br s, 0.5 H), 5.26-5.03 (comp, 2 H), 3.87-3.71 (m, 1 H), 3.27-3.11 (comp, 5 H), 2.80-2.66 (comp, 5 H), 2.52-2.34 (m, 1 H), 2.24-2.09 (m, 1 H), 2.03-1.86 (m, 1 H), 1.84 (d,  $J = 11.0$  Hz, 1 H), 1.62-1.48 (m, 1 H), 1.12 ppm (s, 6 H,  $J = 6.5$  Hz);  $^{13}\text{C}$  NMR (100 MHz,  $\text{CDCl}_3$ , as a mixture of rotamers)  $\delta$  155.2, 154.9, 151.2, 142.3, 142.0, 137.7, 137.3, 137.0, 128.6, 128.6, 128.0, 127.9, 123.2, 123.1, 116.2, 115.8, 112.6, 112.4, 67.0, 58.1, 57.8, 54.8, 50.0, 48.9, 43.9, 39.1, 38.8, 30.6, 18.6; IR (neat): 2936, 2820, 1696, 1417, 1238  $\text{cm}^{-1}$ ; HRMS (ESI)  $m/z$  calcd for  $\text{C}_{26}\text{H}_{34}\text{N}_3\text{O}_2$  ( $\text{M}+\text{H}$ ) $^+$ , 420.2646; found 420.2646.

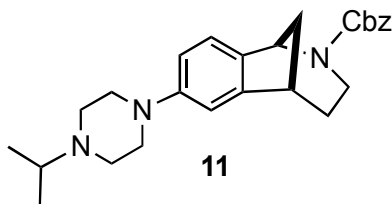

11

**(±)-Benzyl-7-(4-isopropylpiperazin-1-yl)-1,3,4,5-tetrahydro-2H-1,5-methanobenzo[c]azepine-2-carboxylate (11).** From **7** and acetone following general procedure B, 65%, colorless oil:  $^1\text{H}$  NMR (500 MHz,  $\text{CDCl}_3$ , as a mixture of rotamers)  $\delta$  7.47-7.27 (comp, 5 H), 7.21 (d,  $J = 7.3$  Hz, 0.5 H), 7.09 (d,  $J = 7.5$  Hz, 0.5 H), 6.84 (d,  $J = 2.2$  Hz, 1 H), 6.78-6.71 (m, 1 H), 5.43 (br s, 0.5 H), 5.33 (br s, 0.5 H), 5.23-5.05 (comp, 2 H), 3.86-3.73 (m, 1 H), 3.27-3.17 (comp, 5 H), 2.80-2.65 (comp, 5 H), 2.52-2.37 (m, 1 H), 2.25-2.11 (m, 1 H), 2.02-1.79 (comp, 2 H), 1.63-1.48 (m, 1 H), 1.11 (d,  $J = 6.6$  Hz, 6 H); HRMS (ESI)  $m/z$  calcd for  $\text{C}_{26}\text{H}_{34}\text{N}_3\text{O}_2$  ( $\text{M}+\text{H}$ ) $^+$ , 420.2646; found 420.2656.

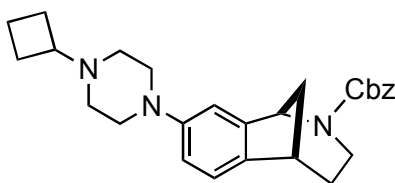

25

**(±)-Benzyl-8-(4-cyclobutylpiperazin-1-yl)-1,3,4,5-tetrahydro-2H-1,5-methanobenzo[c]azepine-2-carboxylate (25).** From **8** and cyclobutanone following general procedure B, 75%, colorless oil:  $^1\text{H}$  NMR (400 MHz,  $\text{CDCl}_3$ , as a mixture of rotamers)  $\delta$  7.46-7.27 (comp, 5 H), 7.10 (d,  $J = 8.2$  Hz, 1 H), 6.97 (br s, 0.5 H), 6.80 (app dd,  $J = 8.2, 2.4$  Hz, 1.5 H), 5.45 (br s, 0.5 H), 5.33 (br s, 0.5 H), 5.26-5.03 (comp, 2 H), 3.87-3.71 (m, 1 H), 3.24-3.07 (comp, 5 H), 2.79 (quint,  $J = 7.9$  Hz, 1 H), 2.49 (t,  $J = 4.8$  Hz, 4 H), 2.47-2.35 (m, 1 H), 2.25-2.02 (comp, 3 H), 2.02-1.48 (comp, 7 H);  $^{13}\text{C}$  NMR (150 MHz,  $\text{CDCl}_3$ , as a mixture of rotamers)  $\delta$  155.2, 154.9, 151.3, 142.3, 142.0, 137.7, 137.0, 128.6, 128.6, 128.0, 127.9, 123.2, 123.1, 116.2, 115.9, 112.7, 112.4, 67.1, 60.5, 58.2, 57.9, 49.7, 49.6.

43.9, 39.1, 38.8, 30.6, 27.1, 14.5. IR (neat) 2939, 2818, 1696, 1418, 1239  $\text{cm}^{-1}$ ; HRMS (ESI)  $m/z$  calcd for  $\text{C}_{27}\text{H}_{34}\text{N}_3\text{O}_2$  ( $\text{M}+\text{H}$ )<sup>+</sup>, 432.2646; found 432.2651.

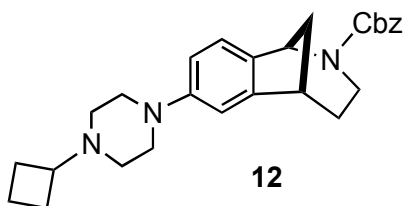

**(±)-Benzyl-7-(4-cyclobutylpiperazin-1-yl)-1,3,4,5-tetrahydro-2H-1,5-methanobenzo[c]azepine-2-carboxylate (12).** From **7** and cyclobutanone following general procedure B, 92%, colorless oil: <sup>1</sup>H NMR (400 MHz,  $\text{CDCl}_3$ , as a mixture of rotamers)  $\delta$  7.46-7.27 (comp, 5 H), 7.20 (d,  $J = 7.2$  Hz, 0.5 H), 7.09 (d,  $J = 7.2$  Hz, 0.5 H), 6.84 (d,  $J = 2.0$  Hz, 1 H), 6.78-6.68 (m, 1 H), 5.43 (br s, 0.5 H), 5.32 (br s, 0.5 H), 5.24-5.04 (comp, 2 H), 3.88-3.70 (m, 1 H), 3.26-3.14 (comp, 5 H), 2.79 (quin,  $J = 7.9$  Hz, 1 H), 2.50 (t,  $J = 4.8$  Hz, 5 H), 2.25-2.12 (m, 1 H), 2.11-1.65 (comp, 8 H), 1.65-1.48 (m, 1 H); <sup>13</sup>C NMR (125 MHz,  $\text{CDCl}_3$ , as a mixture of rotamers)  $\delta$  155.0, 154.9, 152.1, 147.8, 137.3, 137.1, 132.6, 132.2, 128.6, 128.0, 127.9, 124.5, 124.3, 114.7, 111.1, 67.0, 60.4, 57.3, 57.0, 49.6, 49.3, 44.1, 40.3, 38.6, 30.5, 27.1; IR (neat) 2938, 2816, 1659, 1417, 1237, 1199, 1095  $\text{cm}^{-1}$ ; HRMS (ESI)  $m/z$  calcd for  $\text{C}_{27}\text{H}_{34}\text{N}_3\text{O}_2$  ( $\text{M}+\text{H}$ )<sup>+</sup>, 432.2646; found 432.2646.

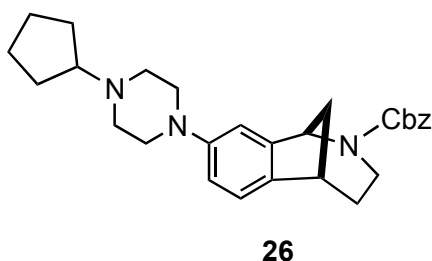

**(±)-Benzyl-8-(4-cyclopentylpiperazin-1-yl)-1,3,4,5-tetrahydro-2H-1,5-methanobenzo[c]azepine-2-carboxylate (26).** From **8** and cyclopentanone following general procedure B, 94%, colorless oil: <sup>1</sup>H NMR (400 MHz,  $\text{CDCl}_3$ , as a mixture of rotamers)  $\delta$  7.44-7.26 (comp, 5 H), 7.10 (d,  $J = 8.2$  Hz, 1 H), 6.97 (br s, 0.55 H), 6.82-6.77 (comp, 1.45 H), 5.44 (d,  $J = 2.7$  Hz, 0.55 H), 5.33 (d,  $J = 2.7$  Hz, 0.45 H), 5.26-5.03 (comp, 2 H), 3.86-3.70 (m, 1 H), 3.24-3.12 (comp, 5 H), 2.68 (t,  $J = 4.8$  Hz, 4 H), 2.61-2.35 (comp, 2 H), 2.25-2.10 (m, 1 H), 2.01-1.40 (comp, 11 H); <sup>13</sup>C NMR (100 MHz,  $\text{CDCl}_3$ , as a mixture of rotamers)  $\delta$  155.2, 151.1, 142.2, 142.0, 137.7, 137.3, 137.0, 128.6, 128.0, 127.9, 123.2, 123.1, 116.1, 115.8, 112.6, 112.3, 67.7, 67.0, 58.1, 57.8, 52.5, 49.7, 43.9, 39.1, 38.8, 30.6, 30.5, 24.3; IR (neat): 2953, 1696, 1417, 1238  $\text{cm}^{-1}$ ; HRMS (ESI)  $m/z$  calcd for  $\text{C}_{28}\text{H}_{36}\text{N}_3\text{O}_2$  ( $\text{M}+\text{H}$ )<sup>+</sup>, 446.2802; found 446.2808.

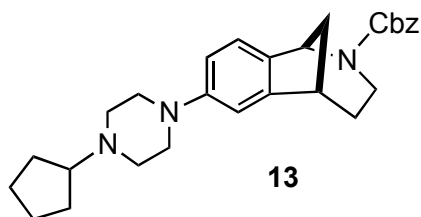

**(±)-Benzyl-7-(4-cyclopentylpiperazin-1-yl)-1,3,4,5-tetrahydro-2H-1,5-methanobenzo[c]azepine-2-carboxylate (13).** From **7** and cyclopentanone following general procedure B, 99%, colorless oil: <sup>1</sup>H NMR (400 MHz,  $\text{CDCl}_3$ , as a mixture of rotamers)  $\delta$  7.46-7.27

(comp, 5 H), 7.21 (d,  $J = 7.9$  Hz, 0.5 H), 7.09 (d,  $J = 7.9$  Hz, 0.5 H), 6.84 (d,  $J = 1.9$  Hz, 1 H), 6.78-6.70 (m, 1 H), 5.43 (br s, 0.5 H), 5.32 (br s, 0.5 H), 5.23-5.04 (comp, 2 H), 3.88-3.72 (m, 1 H), 3.30-3.13 (comp, 5 H), 2.68 (t,  $J = 4.8$  Hz, 4 H), 2.60-2.35 (comp, 2 H), 2.26-2.10 (m, 1 H), 2.04-1.79 (comp, 4 H), 1.75-1.66 (comp, 2 H), 1.64-1.39 (comp, 5 H);  $^{13}\text{C}$  NMR (150 MHz,  $\text{CDCl}_3$ , as a mixture of rotamers)  $\delta$  155.0, 154.9, 152.0, 147.8, 137.3, 137.1, 132.4, 132.1, 128.6, 128.0, 127.9, 124.5, 124.3, 114.5, 111.0, 67.7, 67.0, 57.3, 57.0, 52.5, 49.6, 44.1, 40.3, 38.7, 30.5, 30.54, 30.51, 24.3; IR (neat) 2953, 2817, 1696, 1417, 1237, 1096  $\text{cm}^{-1}$ ; HRMS (ESI)  $m/z$  calcd for  $\text{C}_{28}\text{H}_{36}\text{N}_3\text{O}_2$  ( $\text{M}+\text{H}$ ) $^+$ , 446.2802; found 446.2806.

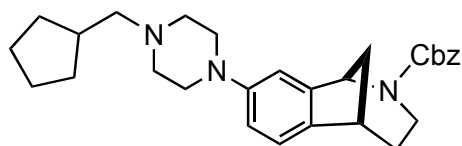

27

**(±)-Benzyl-8-(4-(cyclopentylmethyl)piperazin-1-yl)-1,3,4,5-tetrahydro-2H-1,5-methanobenzo[c]azepine-2-carboxylate (27).** From **8** and cyclopentanecarboxaldehyde following general procedure B, 46%, colorless oil:  $^1\text{H}$  NMR (400 MHz,  $\text{CDCl}_3$ , as a mixture of rotamers)  $\delta$  7.46-7.27 (comp, 5 H), 7.09 (d,  $J = 8.2$  Hz, 1 H), 6.97 (br s, 0.55 H), 6.83-6.76 (comp, 1.45 H), 5.45 (d,  $J = 2.8$  Hz, 0.55 H), 5.33 (d,  $J = 2.8$  Hz, 0.45 H), 5.26-5.04 (comp, 2 H), 3.86-3.70 (m, 1 H), 3.25-3.09 (comp, 5 H), 2.60 (t,  $J = 4.8$  Hz, 4 H), 2.53-2.37 (m, 1 H), 2.34 (d,  $J = 7.5$  Hz, 2 H), 2.24-2.11 (m, 1 H), 2.10 (sept,  $J = 7.5$  Hz, 1 H), 2.03-1.87 (m, 1 H), 1.84 (d,  $J = 3.0$  Hz, 1 H), 1.82-1.74 (comp, 2 H), 1.65-1.48 (comp, 5 H), 1.30-1.16 (comp, 2 H); IR (neat): 2944, 1697, 1417, 1237  $\text{cm}^{-1}$ ; HRMS (ESI)  $m/z$  calcd for  $\text{C}_{29}\text{H}_{38}\text{N}_3\text{O}_2$  ( $\text{M}+\text{H}$ ) $^+$ , 460.2959; found 460.2963.

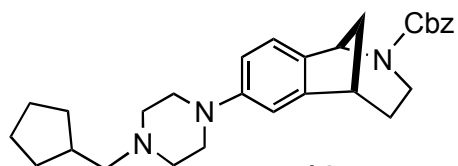

14

**(±)-Benzyl-7-(4-(cyclopentylmethyl)piperazin-1-yl)-1,3,4,5-tetrahydro-2H-1,5-methanobenzo[c]azepine-2-carboxylate (14).** From **7** and cyclopentanecarboxaldehyde following general procedure B, 54%, colorless oil:  $^1\text{H}$  NMR (500 MHz,  $\text{CDCl}_3$ , as a mixture of rotamers)  $\delta$  7.46-7.27 (comp, 5 H), 7.20 (d,  $J = 7.3$  Hz, 0.5 H), 7.12 (d,  $J = 7.3$  Hz, 0.5 H), 6.84 (d,  $J = 2.0$  Hz, 1 H), 6.77-6.71 (m, 1 H), 5.43 (br s, 0.5 H), 5.33 (br s, 0.5 H), 5.22-5.06 (comp, 2 H), 3.87-3.74 (m, 1 H), 3.24-3.16 (comp, 5 H), 2.61 (t,  $J = 5.1$  Hz, 4 H), 2.52-2.37 (m, 1 H), 2.33 (2 H), 2.24-2.14 (m, 1 H), 2.10 (sept,  $J = 6.4$  Hz, 1 H), 2.03-1.89 (m, 1 H), 1.88-1.17 (comp, 10 H); IR (neat): 2945, 2867, 1696, 1418, 1236  $\text{cm}^{-1}$ ; HRMS (ESI)  $m/z$  calcd for  $\text{C}_{29}\text{H}_{38}\text{N}_3\text{O}_2$  ( $\text{M}+\text{H}$ ) $^+$ , 460.2959; found 460.2962.

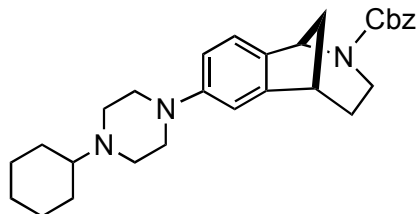

15

**(±)-Benzyl-7-(4-cyclohexylpiperazin-1-yl)-1,3,4,5-tetrahydro-2H-1,5-methanobenzo[c]azepine-2-carboxylate (15):** From **7** and cyclohexanone following general procedure B, 47%, colorless oil:  $^1\text{H}$  NMR (400 MHz,  $\text{CD}_3\text{OD}$ , as a mixture of rotamers)  $\delta$  7.45-7.24 (comp, 5 H), 7.10 (dd,  $J = 12.2, 7.5$  Hz, 1 H), 6.92 (d,  $J = 2.0$  Hz, 1 H), 6.85-6.77 (m, 1 H), 5.31 (brs, 1 H), 5.21-5.04 (comp, 2 H), 3.81-3.69 (m, 1 H), 3.24-3.11 (comp, 5 H), 2.79 (t,  $J = 5.0$  Hz, 4 H), 2.46-2.27 (comp, 2 H), 2.21-2.10 (m, 1 H), 2.04-1.92 (comp, 3 H), 1.84 (app d,  $J = 11.0$  Hz, 3 H), 1.70-1.51 (comp, 2 H), 1.37-1.09 (comp, 5 H);  $^{13}\text{C}$  NMR (150 MHz,  $\text{CD}_3\text{OD}$ , as a mixture of rotamers)  $\delta$  156.7, 156.5, 153.6, 148.8, 138.4, 138.2, 133.3, 129.5, 129.1, 128.9, 128.8, 124.9, 116.0, 112.1, 68.2, 65.0, 58.8, 58.5, 50.6, 50.1, 44.9, 41.4, 39.7, 31.4, 29.7, 27.3, 26.9; IR (neat) 2929, 2853, 1696, 1417, 1235  $\text{cm}^{-1}$ ; HRMS (ESI)  $m/z$  calcd for  $\text{C}_{29}\text{H}_{38}\text{N}_3\text{O}_2$  ( $\text{M}+\text{H}$ ) $^+$ , 460.2959; found 460.2958.

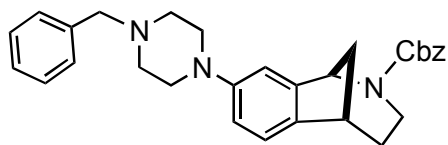

**29**

**(±)-Benzyl-8-(4-benzylpiperazin-1-yl)-1,3,4,5-tetrahydro-2H-1,5-methanobenzo[c]azepine-2-carboxylate (29):** From **8** and benzaldehyde following general procedure B, 65%, colorless oil:  $^1\text{H}$  NMR (400 MHz,  $\text{CDCl}_3$ , as a mixture of rotamers)  $\delta$  7.46-7.24 (comp, 10 H), 7.12 (d,  $J = 8.2$  Hz, 1 H), 6.95-6.71 (comp, 2 H), 5.33 (d,  $J = 4.2$  Hz, 1 H), 5.28-5.04 (comp, 2 H), 3.80-3.66 (m, 1 H), 3.60 (s, 2 H), 3.21-3.05 (comp, 5 H), 2.63 (br s, 4 H), 2.46-2.26 (m, 1 H), 2.21-2.09 (m, 1 H), 2.03-1.89 (m, 1 H), 1.83 (d,  $J = 11.0$  Hz, 1 H), 1.64-1.47 (m, 1 H); HRMS (ESI)  $m/z$  calcd for  $\text{C}_{30}\text{H}_{34}\text{N}_3\text{O}_2$  ( $\text{M}+\text{H}$ ) $^+$ , 468.2646; found 468.2644.

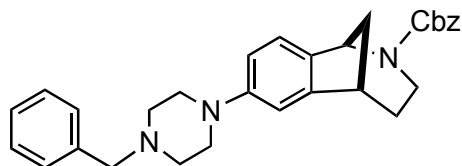

**16**

**(±)-Benzyl-7-(4-benzylpiperazin-1-yl)-1,3,4,5-tetrahydro-2H-1,5-methanobenzo[c]azepine-2-carboxylate (16):** From **7** and benzaldehyde following general procedure B, 74%, colorless oil:  $^1\text{H}$  NMR (500 MHz,  $\text{CDCl}_3$ , as a mixture of rotamers)  $\delta$  7.44-7.26 (comp, 10 H), 7.20 (br d,  $J = 7.8$  Hz, 0.5 H), 7.08 (br d,  $J = 7.8$  Hz, 0.5 H), 6.82 (d,  $J = 2.2$  Hz, 1 H), 6.76-6.70 (m, 1 H), 5.43 (br s, 0.5 H), 5.32 (br s, 0.5 H), 5.23-5.06 (comp, 2 H), 3.86-3.73 (m, 1 H), 3.57 (s, 2 H), 3.25-3.15 (comp, 5 H), 2.65-2.57 (m, 4 H), 2.53-2.38 (m, 1 H), 2.24-2.12 (m, 1 H), 2.03-1.88 (m, 1 H), 1.87-1.80 (m, 1 H), 1.63-1.51 (m, 1 H, behind water peak); HRMS (ESI)  $m/z$  calcd for  $\text{C}_{30}\text{H}_{34}\text{N}_3\text{O}_2$  ( $\text{M}+\text{H}$ ) $^+$ , 468.2646; found 468.2644.

**General Procedure C: Alkylation of piperazines **7** and **8** with acrylates:**

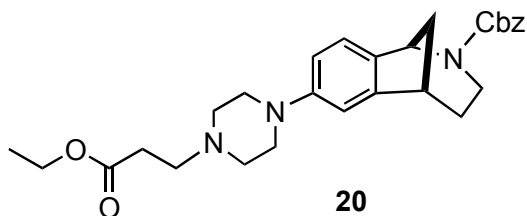

**20**

**(±)-Benzyl-7-(4-(3-ethoxy-3-oxopropyl)piperazin-1-yl)-1,3,4,5-tetrahydro-2H-1,5-methanobenzo[c]azepine-2-carboxylate (20)**. A solution of **7** (20 mg, 0.053) and ethyl acrylate (53 mg, 58 $\mu$ L, 0.53 mmol) in ethanol (1 mL) was stirred for 2.5 h at room temperature. The mixture was concentrated under reduced pressure and the residue was purified via flash column chromatography (SiO<sub>2</sub>), eluting with MeOH/CH<sub>2</sub>Cl<sub>2</sub> (2% v/v), to afford 25 mg (99%) of **20** as a colorless oil: <sup>1</sup>H NMR (400 MHz, CDCl<sub>3</sub>, as a mixture of rotamers)  $\delta$  7.45-7.27 (comp, 5 H), 7.21 (d, *J* = 7.8 Hz, 0.5 H), 7.09 (d, *J* = 7.8 Hz, 0.5 H), 6.83 (d, *J* = 2.2 Hz, 1 H), 6.73 (br s, 1 H), 5.43 (br s, 0.5 H), 5.32 (br s, 0.5 H), 5.22-5.05 (comp, 2 H), 4.15 (q, *J* = 7.2 Hz, 2 H), 3.87-3.71 (m, 1 H), 3.25-3.13 (comp, 5 H), 2.76 (t, *J* = 7.2 Hz, 2 H), 2.63 (t, *J* = 5.0 Hz, 4 H), 2.54 (t, *J* = 7.3 Hz, 2 H), 2.50-2.36 (m, 1 H), 2.24-2.10 (m, 1 H), 2.03-1.88 (m, 1 H), 1.84 (d, *J* = 7.9 Hz, 1 H), 1.64-1.49 (m, 1 H), 1.26 (t, *J* = 7.2 Hz, 3 H); <sup>13</sup>C NMR (125 MHz, CDCl<sub>3</sub>, as a mixture of rotamers)  $\delta$  172.6, 155.0, 154.9, 152.0, 147.8, 137.3, 137.1, 132.5, 132.2, 128.6, 128.0, 127.9, 124.5, 124.3, 114.6, 111.0, 67.0, 60.6, 57.3, 57.0, 53.7, 53.1, 49.6, 44.1, 40.3, 38.6, 32.5, 30.5; IR (neat) 2940, 2821, 1733, 1695, 1418, 1237, 1200 cm<sup>-1</sup>; HRMS (ESI) *m/z* calcd for C<sub>28</sub>H<sub>36</sub>N<sub>3</sub>O<sub>4</sub> (M+H)<sup>+</sup>, 478.2700; found 478.2700.

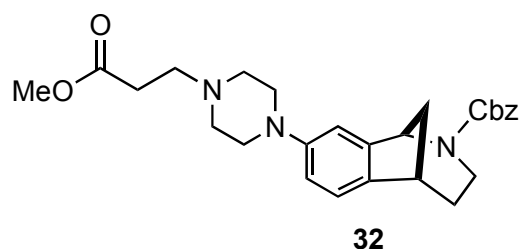

**(±)-Benzyl-8-(4-(3-methoxy-3-oxopropyl)piperazin-1-yl)-1,3,4,5-tetrahydro-2H-1,5-methanobenzo[c]azepine-2-carboxylate (32)**. From **8** and methyl acrylate following general procedure C, 99%, colorless oil: <sup>1</sup>H NMR (400 MHz, CDCl<sub>3</sub>, as a mixture of rotamers)  $\delta$  7.47-7.27 (comp, 5 H), 7.10 (d, *J* = 8.2 Hz, 1 H), 6.96 (br s, 0.55 H), 6.79 (app dd, *J* = 8.2, 2.4 Hz, 1.45 H), 5.45 (d, *J* = 2.5 Hz, 0.55 H), 5.33 (d, *J* = 2.5 Hz, 0.45 H), 5.26-5.04 (comp, 2 H), 3.86-3.72 (m, 1 H), 3.69 (s, 3 H), 3.22-3.06 (comp, 5 H), 2.76 (t, *J* = 7.4 Hz, 2 H), 2.62 (t, *J* = 4.9 Hz, 4 H), 2.56 (t, *J* = 7.4 Hz, 2 H), 2.52-2.34 (m, 1 H), 2.24-2.09 (m, 1 H), 2.01-1.87 (m, 1 H), 1.84 (d, *J* = 11.0 Hz, 1 H), 1.62-1.48 (m, 1 H); <sup>13</sup>C NMR (100 MHz, CDCl<sub>3</sub>, as a mixture of rotamers)  $\delta$  172.8, 155.1, 154.8, 151.0, 142.2, 141.9, 137.7, 137.2, 136.9, 128.5, 127.9, 127.8, 123.1, 116.2, 115.9, 112.4, 112.2, 66.9, 58.1, 57.8, 53.5, 53.0, 51.8, 49.6, 43.8, 39.0, 38.7, 32.0, 30.5. IR (neat): 2945, 2821, 1738, 1695, 1418, 1239, 1200, 1097 cm<sup>-1</sup>. HRMS (ESI) *m/z* calcd for C<sub>27</sub>H<sub>34</sub>N<sub>3</sub>O<sub>4</sub> (M+H)<sup>+</sup>, 464.2544; found 464.2546.

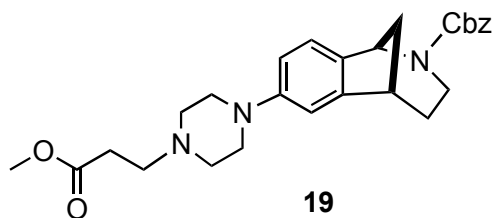

**(±)-Benzyl-7-(4-(3-methoxy-3-oxopropyl)piperazin-1-yl)-1,3,4,5-tetrahydro-2H-1,5-methanobenzo[c]azepine-2-carboxylate (19)**. From **7** and methyl acrylate following general procedure C, 81%, colorless oil: <sup>1</sup>H NMR (400 MHz, CDCl<sub>3</sub>, as a mixture of rotamers)  $\delta$  7.46-7.27 (comp, 5 H), 7.21 (d, *J* = 7.0 Hz, 0.5 H), 7.09 (d, *J* = 7.0 Hz, 0.5 H), 6.83 (d, *J* = 2.1 Hz, 1 H), 6.73 (br s, 1 H), 5.43 (br s, 0.5 H), 5.33 (br s, 0.5 H), 5.24-5.03 (comp, 2 H), 3.88-3.73 (m, 1 H), 3.69 (s, 3 H), 3.24-3.15 (comp, 5 H), 2.76 (t, *J* = 7.3 Hz, 2 H), 2.63 (t, *J* = 5.0 Hz, 4 H), 2.55 (t, *J* = 7.2 Hz, 2 H), 2.51-2.36 (m, 1 H), 2.24-2.11 (m, 1 H), 2.04-1.88 (m, 1 H), 1.84 (d, *J* = 10.7 Hz, 1 H), 1.66-1.49 (m, 1 H); <sup>13</sup>C NMR (100 MHz, CDCl<sub>3</sub>, as a mixture of rotamers)  $\delta$  172.9, 155.0, 154.9, 152.0, 147.8, 137.3, 137.1, 132.6, 132.4, 128.6, 128.0, 127.9, 124.5, 124.3, 114.7, 111.1, 67.0, 57.3, 57.1, 53.1, 51.9, 49.5, 44.1,



40.4, 38.7, 32.2, 30.5; IR (neat): 2945, 2821, 1738, 1694, 1418, 1237, 1200  $\text{cm}^{-1}$ ; HRMS (ESI)  $m/z$  calcd for  $\text{C}_{27}\text{H}_{34}\text{N}_3\text{O}_4$  ( $\text{M}+\text{H}$ )<sup>+</sup>, 464.2544; found 464.2544.

**General Procedure D: Alkylation of piperazines 7 and 8 with alkyl bromides:**

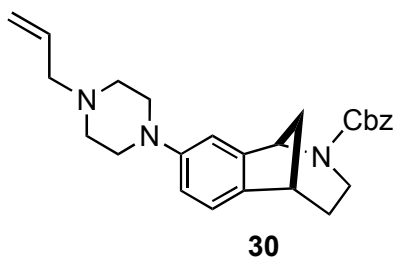

**(±)-Benzyl-8-(4-allylpiperazin-1-yl)-1,3,4,5-tetrahydro-2H-1,5-methanobenzo-[c]azepine-2-carboxylate (30).** A mixture of  $\text{K}_2\text{CO}_3$  (17 mg, 0.12 mmol), **8** (15 mg, 0.04 mmol), and allyl bromide (5 mg, 3.6  $\mu\text{L}$ , 0.05 mmol) in acetone was stirred at room temperature for 24 h. The mixture was filtered, and the filtrate was concentrated under reduced pressure. The residue was purified via flash column chromatography ( $\text{SiO}_2$ ), eluting with  $\text{MeOH}/\text{CH}_2\text{Cl}_2$  (2% v/v), to afford 14 mg (86%) of **30** as a colorless oil:  $^1\text{H}$  NMR (400 MHz,  $\text{CDCl}_3$ , as a mixture of rotamers)  $\delta$  7.49-7.26 (comp, 5 H), 7.11 (d,  $J = 8.3$  Hz, 1 H), 6.97 (br s, 0.6 H), 6.84-6.75 (comp, 1.4 H), 6.02-5.86 (m, 1 H), 5.50-5.01 (comp, 5 H), 3.89-3.71 (m, 1 H), 3.32-3.02 (comp, 7 H), 2.66 (br s, 4 H), 2.52-2.34 (m, 1 H), 2.24-2.09 (m, 1 H), 2.03-1.87 (m, 1 H), 1.84 (d,  $J = 10.2$  Hz, 1 H), 1.64-1.48 (m, 1 H);  $^{13}\text{C}$  NMR (100 MHz,  $\text{CDCl}_3$ , as a mixture of rotamers)  $\delta$  155.2, 154.9, 151.2, 142.3, 142.0, 137.6, 137.3, 137.0, 135.0, 128.6, 128.0, 127.9, 123.19, 123.12, 118.3, 116.2, 115.8, 112.5, 112.3, 67.0, 61.9, 58.2, 57.9, 53.3, 49.8, 43.9, 39.1, 38.8, 30.6; IR (neat) 2938, 2818, 1696, 1419, 1236  $\text{cm}^{-1}$ ; HRMS (ESI)  $m/z$  calcd for  $\text{C}_{26}\text{H}_{32}\text{N}_3\text{O}_2$  ( $\text{M}+\text{H}$ )<sup>+</sup>, 418.2489; found 418.2486.

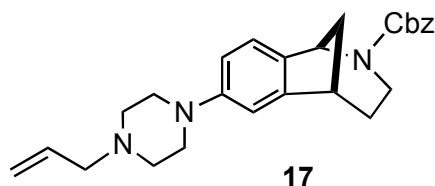

**(±)-Benzyl-7-(4-allylpiperazin-1-yl)-1,3,4,5-tetrahydro-2H-1,5-methanobenzo-[c]azepine-2-carboxylate (17).** From **7** and allyl bromide following general procedure D, 84%, colorless oil:  $^1\text{H}$  NMR (400 MHz,  $\text{CD}_3\text{OD}$ , as a mixture of rotamers)  $\delta$  7.45-7.25 (comp, 5 H), 7.14 (d,  $J = 8.2$  Hz, 0.5 H), 7.06 (d,  $J = 8.2$  Hz, 0.5 H), 6.93 (d,  $J = 2.3$  Hz, 1 H), 6.85-6.77 (m, 1 H), 5.92 (ddt,  $J = 16.9, 10.1, 6.7$  Hz, 1 H), 5.35-5.04 (comp, 5 H), 3.81-3.69 (m, 1 H), 3.27-3.18 (comp, 5 H), 3.09 (d,  $J = 6.7$  Hz, 2 H), 2.69-2.61 (m, 4 H), 2.48-2.27 (m, 1 H), 2.24-2.11 (m, 1 H), 2.04-1.92 (m, 1 H), 1.85 (d,  $J = 10.8$  Hz, 1 H), 1.67-1.52 (m, 1 H); HRMS (ESI)  $m/z$  calcd for  $\text{C}_{26}\text{H}_{32}\text{N}_3\text{O}_2$  ( $\text{M}+\text{H}$ )<sup>+</sup>, 418.2489; found 418.2492.

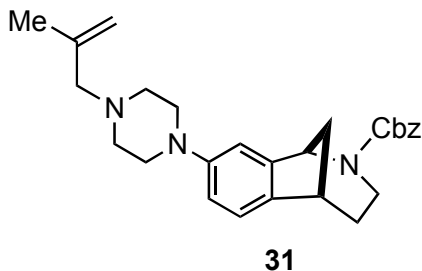

**(±)-Benzyl-8-(4-(2-methylallyl)piperazin-1-yl)-1,3,4,5-tetrahydro-2H-1,5-methanobenzo-[c]azepine-2-carboxylate (31):** From **8** and 3-bromo-2-methylpropene following

general procedure D, 97%, colorless oil:  $^1\text{H}$  NMR (400 MHz,  $\text{CDCl}_3$ , as a mixture of rotamers)  $\delta$  7.45-7.28 (comp, 5 H), 7.10 (d,  $J = 8.2$  Hz, 1 H), 6.97 (br s, 0.6 H), 6.81 (d,  $J = 8.2$  Hz, 1.4 H), 5.47-5.43 (m, 0.6 H), 5.36-5.31 (m, 0.4 H), 5.26-5.05 (comp, 2 H), 4.91 (d,  $J = 10.4$  Hz, 2 H), 3.87-3.72 (m, 1 H), 3.26-3.08 (comp, 5 H), 2.94 (s, 2 H), 2.64-2.48 (comp, 4 H), 2.48-2.36 (m, 1 H), 2.24-2.10 (m, 1 H), 2.02-1.88 (m, 1 H), 1.84 (d,  $J = 10.4$  Hz, 1 H), 1.79 (s, 3 H), 1.70-1.48 (m, 1 H);  $^{13}\text{C}$  NMR (150 MHz,  $\text{CDCl}_3$ , as a mixture of rotamers)  $\delta$  155.0, 154.8, 151.2, 142.1, 141.8, 137.2, 136.9, 128.5, 128.4, 127.9, 127.8, 123.1, 123.0, 116.0, 115.7, 112.3, 66.9, 65.3, 58.0, 57.7, 53.1, 49.7, 43.8, 39.0, 38.6, 30.5, 29.7, 21.0; IR (neat) 2935, 2804, 1692  $\text{cm}^{-1}$ ; HRMS (ESI)  $m/z$  calcd for  $\text{C}_{27}\text{H}_{34}\text{N}_3\text{O}_2$  ( $\text{M}+\text{H}$ ) $^+$ , 432.2646; found 432.2650.

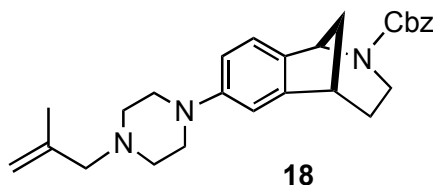

**(±)-Benzyl-7-(4-(2-methylallyl)piperazin-1-yl)-1,3,4,5-tetrahydro-2H-1,5-methanobenzo[c]azepine-2-carboxylate (18).** From **7** and 3-bromo-2-methylpropene following general procedure D, 47%, colorless oil:  $^1\text{H}$  NMR (400 MHz,  $\text{CDCl}_3$ , as a mixture of rotamers)  $\delta$  7.45-7.16 (comp, 5 H), 7.21 (d,  $J = 7.9$  Hz, 0.5 H), 7.10 (d,  $J = 7.5$  Hz, 0.5 H), 6.85 (d,  $J = 2.4$  Hz, 1 H), 6.78-6.72 (m, 1 H), 5.44 (br s, 0.5 H), 5.34 (br s, 0.5 H), 5.24-5.06 (comp, 2 H) 4.90 (d,  $J = 15.1$  Hz, 2 H), 3.91-3.74 (m, 1 H), 3.26-3.14 (comp, 5 H), 2.94 (s, 2 H), 2.60-2.38 (comp, 5 H), 2.25-2.10 (m, 1 H), 2.03-1.89 (m, 1 H), 1.88-1.81 (m, 1 H), 1.77 (s, 3 H), 1.66-1.50 (m, 1 H);  $^{13}\text{C}$  NMR (150 MHz,  $\text{CDCl}_3$ , as a mixture of rotamers)  $\delta$  155.0, 154.9, 152.2, 147.8, 142.7, 137.3, 137.1, 132.3, 132.0, 128.6, 128.0, 127.9, 124.5, 124.3, 114.5, 113.2, 110.9, 67.0, 65.5, 57.3, 57.1, 53.3, 49.7, 44.2, 40.4, 38.7, 30.5, 21.1; IR (neat) 2939, 2816, 1696, 1418  $\text{cm}^{-1}$ ; HRMS (ESI)  $m/z$  calcd for  $\text{C}_{27}\text{H}_{34}\text{N}_3\text{O}_2$  ( $\text{M}+\text{H}$ ) $^+$ , 432.2646; found 432.2653.

**General Procedure E: Suzuki cross coupling of aryl chlorides 5 and 6:**

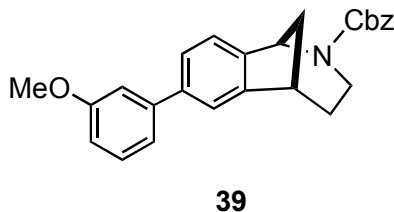

**(±)-Benzyl-7-(3-methoxyphenyl)-1,3,4,5-tetrahydro-2H-1,5-methanobenzo[c]azepine-2-carboxylate (39):** A solution of carbamate **5** (122 mg, 0.37 mmol), 3-methoxyphenylboronic acid (114 mg, 0.74 mmol),  $\text{Cs}_2\text{CO}_3$  (243 mg, 0.75 mmol),  $\text{Pd}[(t\text{-butyl})_3\text{phosphine}]_2$  (9.5 mg, 0.02 mmol) in degassed 1,4-dioxane (1.5 mL) was stirred for 5 h at 100  $^\circ\text{C}$ . The reaction was cooled to room temp and diluted with  $\text{CH}_2\text{Cl}_2$  (3 mL) and filtered through Celite. The filter cake was rinsed with  $\text{CH}_2\text{Cl}_2$  (10 mL) and the mixture was concentrated under reduced pressure to provide the crude product, which was purified via radial plc ( $\text{SiO}_2$ ) eluting with ethyl acetate/hexanes (5% v/v) to give 110 mg (74%) of **39** as a white foam:  $^1\text{H}$  NMR (600 MHz,  $\text{CDCl}_3$ , as a mixture of rotamers)  $\delta$  7.48-7.38 (comp, 5 H), 7.37-7.36 (m, 1 H), 7.36-7.33 (comp, 3 H), 7.18 (d,  $J = 6.0$  Hz, 1 H), 7.13-7.11 (m, 1 H), 6.90 (d,  $J = 12$  Hz, 1 H), 5.56 (br s, 0.6 H), 5.45 (br s, 0.4 H), 5.26-5.06 (comp, 2 H), 3.88-3.34 (m, 1 H), 3.87 (s, 3 H), 3.38-3.30 (m, 1 H), 2.59-2.43 (m, 1 H), 2.25 (br d,  $J = 30$  Hz, 1 H), 2.09-1.97 (m, 1 H), 1.95-1.85 (m, 1 H), 1.92 (d,  $J = 10$  Hz, 1 H);  $^{13}\text{C}$  NMR (150 MHz,  $\text{CDCl}_3$ , as a mixture of rotamers)  $\delta$  159.9, 155.0, 154.8, 147.1, 142.8, 141.6, 140.2, 140.0, 137.0, 136.8, 129.7, 128.5, 127.9, 127.8, 126.4, 124.1, 123.8, 121.6, 119.7,

112.9, 112.7, 67.0, 57.3, 57.1, 55.3, 43.7, 39.9, 38.6, 30.3, 29.7; IR (neat) 2941, 1699, 1421, 1302  $\text{cm}^{-1}$ ; HRMS (ESI)  $m/z$  calcd for  $\text{C}_{26}\text{H}_{25}\text{NO}_3\text{Na}$  ( $\text{M}+\text{Na}$ ) $^+$ , 422.1727, found 422.1734.

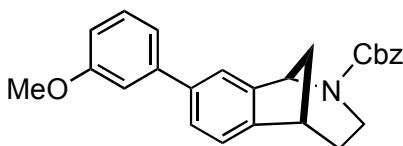

40

**(±)-Benzyl-8-(3-methoxyphenyl)-1,3,4,5-tetrahydro-2H-1,5-methanobenzo[c]azepine-2-carboxylate (40):** From **6** and (3-methoxyphenyl)boronic acid following general procedure E, 57%, colorless oil:  $^1\text{H}$  NMR (400 MHz,  $\text{CDCl}_3$ , as a mixture of rotamers)  $\delta$  7.61 (br s, 0.4 H), 7.54-7.32 (comp, 7.6 H), 7.30 (dd,  $J = 7.4, 2.2$  Hz, 1 H), 7.22-7.08 (comp, 2 H), 6.90 (dd,  $J = 8.4, 2.4$  Hz, 1 H), 5.61 (br s, 0.6 H), 5.49 (br s, 0.4 H), 5.30-5.09 (comp, 2 H), 3.95-3.80 (m, 1 H), 3.88 (s, 3 H), 3.36-3.31 (m, 1 H), 2.62-2.46 (m, 1 H), 2.36-2.20 (m, 1 H), 2.12-1.97 (m, 1 H), 1.93 (d,  $J = 10.8$  Hz, 1 H), 1.72-1.60 (m, 1 H);  $^{13}\text{C}$  NMR (100 MHz,  $\text{CDCl}_3$ , as a mixture of rotamers)  $\delta$  160.9, 159.9, 157.6, 155.0, 154.8, 145.5, 142.5, 141.7, 141.4, 140.4, 129.9, 129.7, 128.4, 127.8, 127.3, 122.9, 122.6, 119.6, 112.8, 112.6, 107.8, 105.8, 101.5, 67.0, 57.6, 57.3, 55.3, 55.1, 43.7, 39.4, 38.5, 34.6, 32.1, 32.0, 31.5, 30.9, 30.2; IR (neat) 2941, 1698, 1432  $\text{cm}^{-1}$ ; HRMS (ESI)  $m/z$  calcd for  $\text{C}_{26}\text{H}_{25}\text{NO}_3\text{Na}$  ( $\text{M}+\text{Na}$ ) $^+$ , 422.1727, found 422.1733.

**General Procedure F: Deprotection/N-benylation of carbamates 35, 36, 39 and 40:**

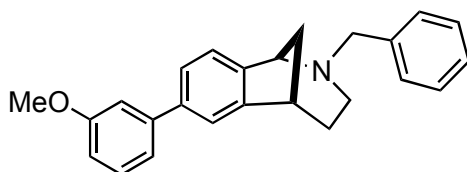

41

**(±)-2-Benzyl-7-(3-methoxyphenyl)-2,3,4,5-tetrahydro-1H-1,5-methanobenzo[c]azepine (41):** Iodotrimethylsilane (52 mg, 37  $\mu\text{L}$ , 0.26 mmol) was added to a solution of carbamate **39** (52 mg, 0.13 mmol) in  $\text{CH}_2\text{Cl}_2$  (1.2 mL) at 0  $^\circ\text{C}$  in the dark. After stirring for 5 min at 0  $^\circ\text{C}$  and 4 h at room temp, in the dark, MeOH (3 mL) and a saturated aqueous  $\text{NaHCO}_3$  solution (3 mL) were added, and the mixture was stirred for 10 min at room temp. The MeOH was removed under reduced pressure, and the aqueous mixture was extracted with  $\text{CH}_2\text{Cl}_2$  (3 x 10 mL). The combined organic extracts were dried ( $\text{Na}_2\text{SO}_4$ ), filtered and concentrated under reduced pressure, and the residue was purified via flash column chromatography ( $\text{SiO}_2$ ), eluting with EtOAc/hexanes (10% v/v)  $\rightarrow$  EtOAc/hexanes (20% v/v) to give 40 mg (87 %) of benzylamine **41** as a colorless oil:  $^1\text{H}$  NMR (400 MHz,  $\text{CDCl}_3$ )  $\delta$  7.49-7.43 (comp, 4 H), 7.40-7.34 (comp, 3 H), 7.31-7.25 (comp, 2 H), 7.23-7.20 (m, 1 H), 7.17 (t,  $J = 2.0$  Hz, 1 H), 6.91 (dd,  $J = 8.4, 2.4$  Hz, 1 H), 4.00-3.96 (m, 1 H), 3.89 (s, 3 H), 3.50 (d,  $J = 13.0$  Hz, 1 H), 3.38 (d,  $J = 13.0$  Hz, 1 H), 3.24-3.19 (m, 1 H), 2.70-2.60 (m, 1 H), 2.27-2.20 (m, 1 H), 2.14-2.0 (comp, 2 H), 1.66-1.55 (comp, 2 H);  $^{13}\text{C}$  NMR (75 MHz,  $\text{CDCl}_3$ )  $\delta$  160.2, 147.8, 143.3, 141.2, 130.0, 129.6, 128.7, 127.4, 125.6, 124.7, 121.8, 120.0, 113.1, 112.9, 62.6, 60.4, 55.6, 47.4, 44.6, 40.1, 30.3; IR (neat): 2939, 1608, 1472, 1227, 1065  $\text{cm}^{-1}$ ; HRMS (ESI)  $m/z$  calcd for  $\text{C}_{25}\text{H}_{26}\text{NO}$  ( $\text{M}+\text{H}$ ) $^+$ , 356.2009; found 356.2010.

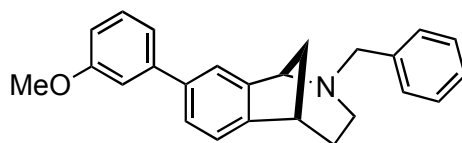

42

**(±)-2-Benzyl-8-(3-methoxyphenyl)-2,3,4,5-tetrahydro-1H-1,5-methanobenzo[c]azepine (42):**

From **40**, following general procedure F, 75%, colorless oil:  $^1\text{H}$  NMR (400 MHz,  $\text{CDCl}_3$ )  $\delta$  7.49 (dd,  $J = 7.6, 1.8$  Hz, 1 H), 7.46-7.21 (comp, 9 H), 7.17 (t,  $J = 2.0$  Hz, 1 H), 6.92 (dd,  $J = 8.4, 2.4$  Hz, 1 H), 3.99 (d,  $J = 4.0$  Hz, 1 H), 3.90 (s, 3 H), 3.52 (d,  $J = 13.4$  Hz, 1 H), 3.35 (d,  $J = 13.4$  Hz, 1 H), 3.22-3.17 (m, 1 H), 2.68-2.58 (m, 1 H), 2.27-2.19 (m, 1 H), 2.13-2.03 (comp, 2 H), 1.64-1.53 (comp, 2 H);  $^{13}\text{C}$  NMR (125 MHz,  $\text{CDCl}_3$ )  $\delta$  160.0, 146.1, 143.2, 139.4, 129.7, 129.2, 128.3, 127.0, 126.8, 123.0, 122.7, 119.7, 113.1, 112.3, 62.8, 60.2, 55.3, 47.1, 44.5, 39.6, 29.7; IR (neat): 2928, 2853, 1609, 1472  $\text{cm}^{-1}$ ; HRMS (ESI)  $m/z$  calcd for  $\text{C}_{25}\text{H}_{26}\text{NO}$  ( $\text{M}+\text{H}$ ) $^+$ , 356.2009; found 356.2012.

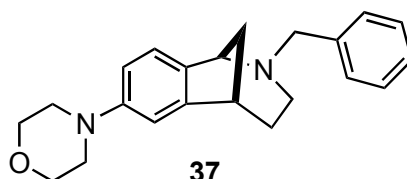

37

**(±)-2-Benzyl-2,3,4,5-tetrahydro-1H-1,5-methanobenzo[c]azepin-7-yl)morpholine (37):**

From **35**, following general procedure F, 58%, colorless oil:  $^1\text{H}$  NMR (400 MHz,  $\text{CDCl}_3$ )  $\delta$  7.38 (d,  $J = 6.8$  Hz, 2 H), 7.33 (t,  $J = 7.2$  Hz, 2 H), 7.26-7.24 (m, 1 H), 7.12 (d,  $J = 8.0$  Hz, 1 H), 6.85 (d,  $J = 2.0$  Hz, 1 H), 6.75 (dd,  $J = 8.2, 2.2$  Hz, 1 H), 3.88 (t,  $J = 4.8, 4$  Hz), 3.83 (d,  $J = 4.8$  Hz, 1 H), 3.7 (d,  $J = 13.2$  Hz, 1 H), 3.27 (d,  $J = 13.2$  Hz, 1 H), 3.18 (t,  $J = 5.0$  Hz, 4 H), 3.09-3.05 (m, 1 H), 2.57-2.51 (m, 1 H), 2.18-2.12 (m, 1 H), 2.02-1.92 (m, 1 H), 1.92 (d,  $J = 10.4$  Hz, 1 H), 1.55-1.45 (comp, 2 H);  $^{13}\text{C}$  NMR (mono-HCl salt) (125 MHz,  $\text{DMSO-d}_6$ )  $\delta$  151.3, 148.7, 131.3, 131.2, 130.0, 129.2, 128.7, 126.8, 114.28, 111.0, 65.6, 63.1, 57.3, 49.1, 46.6, 39.8, 38.0, 26.8; IR (mono HCl salt) (neat): 2964, 1628, 1432  $\text{cm}^{-1}$ ; HRMS (ESI)  $m/z$  calcd for  $\text{C}_{22}\text{H}_{27}\text{N}_2\text{O}$  ( $\text{M}+\text{H}$ ) $^+$ , 335.2118; found 335.2128.

**General Procedure G: Deprotection/sulfonylation of arylpiperazines 9 and 22:**

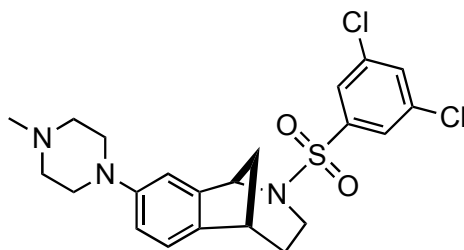

34

**(±)-2-((3,5-Dichlorophenyl)sulfonyl)-8-(4-methylpiperazin-1-yl)-2,3,4,5-tetrahydro-1H-1,5-methanobenzo[c]azepine (34):** Iodotrimethylsilane (613 mg, 0.436 mL 3.06 mmol) was added in one portion to a solution of carbamate **22** (300 mg, 0.766 mmol) in  $\text{CH}_2\text{Cl}_2$  at 0  $^\circ\text{C}$  in flask wrapped in foil. The mixture was stirred for 75 min, and it was then cannulated into  $\text{HCl}_{(\text{aq})}$  (3 M, 20 mL) at  $\sim 5$   $^\circ\text{C}$ , using  $\text{CH}_2\text{Cl}_2$  (15 mL) to ensure complete transfer. The biphasic mixture was concentrated under reduced pressure to remove  $\text{CH}_2\text{Cl}_2$ , and the aqueous layer was washed with  $\text{Et}_2\text{O}$  (3x10 mL) to remove benzyl iodide. The pH of the aqueous layer was adjusted to  $\sim 8$  by the slow addition of solid NaOH, and was subsequently extracted with  $\text{Et}_2\text{O}$  (3x20 mL). The combined organic extracts were dried ( $\text{Na}_2\text{SO}_4$ ) and

concentrated under reduced pressure to afford 161 mg (82%) of the secondary amine intermediate, which was of sufficient purity (>95% LC and  $^1\text{H}$  NMR) to be used in subsequent reactions without purification. 3,5-Dichlorosulfonyl chloride (35 mg, 0.143 mmol) was added to a stirred solution of secondary amine (28 mg, 0.109 mmol) and  $\text{Et}_3\text{N}$  (33 mg, 46  $\mu\text{L}$ ) in DCE (1 mL) at room temp. After 15 min, the mixture was poured into water (15 mL) and extracted with  $\text{CH}_2\text{Cl}_2$  (3x10 mL). The combined organic extracts were dried ( $\text{MgSO}_4$ ) and concentrated under reduced pressure. The residue was purified via flash column chromatography ( $\text{SiO}_2$ ), eluting with  $\text{MeOH}/\text{CH}_2\text{Cl}_2$  (0%  $\rightarrow$  2% v/v gradient), to afford 35 mg (70%) of **34** as a colorless foam. The characterization data for **34** have been previously reported.<sup>3</sup>

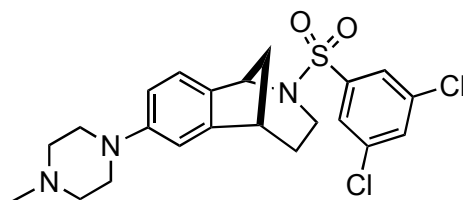

**21**

**(±)-2-((3,5-Dichlorophenyl)sulfonyl)-7-(4-methylpiperazin-1-yl)-2,3,4,5-tetrahydro-1H-1,5-methanobenzo[c]azepine (21):** From **9**, via TMSI and 3,5-dichlorophenylsulfonyl chloride, following general procedure G, 78%, colorless foam:  $^1\text{H}$  NMR (400 MHz,  $\text{CDCl}_3$ )  $\delta$  7.63 (d,  $J = 2.0$  Hz, 2 H), 7.52 (t,  $J = 2.0$  Hz, 1 H), 6.76 (br s, 1 H), 6.55 (app d,  $J = 1.4$  Hz, 2 H), 5.04 (d,  $J = 4.3$  Hz, 1 H), 3.56 (dd,  $J = 11.9, 5.9$  Hz, 1 H), 3.23 (dd,  $J = 5.5, 4.5$  Hz, 4 H), 3.20-3.15 (m, 1 H), 2.65 (t,  $J = 5.0$  Hz, 4 H), 2.40 (s, 3 H), 2.29-2.16 (comp, 2 H), 2.10-2.00 (m, 1 H), 1.97 (d,  $J = 10.9$  Hz, 1 H), 1.60 (d,  $J = 12.5$  Hz, 1 H);  $^{13}\text{C}$  NMR (100 MHz,  $\text{CDCl}_3$ )  $\delta$  152.0, 147.6, 142.7, 136.0, 132.3, 129.4, 125.8, 124.4, 114.4, 110.8, 59.7, 55.0, 48.9, 45.9, 44.8, 40.5, 39.9, 30.0; IR (neat): 2938, 1614, 1568, 1350, 1167, 936  $\text{cm}^{-1}$ ; HRMS (ESI)  $m/z$  calcd for  $\text{C}_{22}\text{H}_{26}\text{Cl}_2\text{N}_3\text{O}_2\text{S}$  ( $\text{M}+\text{H}$ ) $^+$ , 466.1117; found 466.1117.

## References

- Pangborn, A. B.; Giardello, M. A.; Grubbs, R. H.; Rosen, R. K.; Timmers, F. J. Safe and convenient procedure for solvent purification. *Organometallics* **1996**, *15*, 1518-1520.
- Still, W. C.; Kahn, M.; Mitra, A. Rapid chromatographic technique for preparative separations with moderate resolution. *J. Org. Chem.* **1978**, *43*, 2923-2925.
- Sahn, J. J.; Martin, S. F. Expedient synthesis of norbenzomorphan library via multicomponent assembly process coupled with ring-closing reactions. *ACS Combi. Sci.* **2012**, *14*, 496-502.
- Sahn, J. J.; Hodges, T. R.; Martin, S. F. Norbenzomorphan framework as a novel scaffold for generating sigma 2 subtype selective ligands. *ChemMedChem* **2016**, *11*, 556-561.

## Sigma Receptor Binding Assay Protocol:

Receptor binding assays were performed by the Psychoactive Drug Screening Program (PDSP) at Chapel Hill, North Carolina. The assay protocol book can be accessed free of charge at:

<https://pdspdb.unc.edu/pdspWeb/content/PDSP%20Protocols%20II%202013-03-28.pdf>. Briefly,  $\sigma_1$  receptors were sourced from Guinea pig brain and Sig1R binding affinity ( $K_i$ ) was determined through competition binding assays with [ $^3\text{H}$ ]-(+)-pentazocine.  $\sigma_2$  receptors were obtained from rat PC12 cells and the Sig2R ligand binding affinity ( $K_i$ ) was determined through competition binding assays using the radioligand [ $^3\text{H}$ ]-ditolylguanidine in the presence of (+)-pentazocine to block  $\sigma_1$  receptor binding sites.  $K_i$  values are calculated from best-fit  $\text{IC}_{50}$  determinations and are the average of 2 or more independent runs performed in triplicate.

**Table S1. Binding affinity ( $K_i$ , nM) of representative compounds at non- $\sigma_1$  receptor targets.**

| ID | 5HT <sub>1A</sub> | 5HT <sub>1B</sub> | 5HT <sub>1D</sub> | 5HT <sub>2A</sub> | 5HT <sub>2B</sub>  | 5HT <sub>2C</sub>  | 5HT <sub>3</sub> | 5HT <sub>6</sub> | 5HT <sub>7</sub> | $\alpha_{1A}$ |
|----|-------------------|-------------------|-------------------|-------------------|--------------------|--------------------|------------------|------------------|------------------|---------------|
| 9  | 2,777             | 1,562             | 1,101             | 127               | 531                | 52                 | 7,475            | 300              | >10,000          | >10,000       |
| 22 | 158               | 1,504             | 2,007             | 610               | 483                | 245                | *                | 278              | 742              | *             |
| 17 | 5,341             | 2,157             | 1,172             | 420               | 568                | 842                | >10,000          | 1,810            | >10,000          | 4,485         |
| 30 | 1,771             | 1,523             | 813               | 2,159             | 1,656              | *                  | *                | 1,351            | 1,875            | *             |
| 15 | 4,036             | 5,235             | 2,998             | 2,097             | 439                | 3,939              | 4,866            | 4,522            | 2,764            | 7,293         |
| 28 | 1,438             | >10,000           | 8,660             | 1,123             | 609                | 6,186              | >10,000          | 2,031            | 795              | 2,620         |
| 16 | 4,303             | >10,000           | 3,049             | >10,000           | 994                | 6,527              | 7,595            | >10,000          | >10,000          | >10,000       |
| 29 | 2,634             | 3,307             | 4,380             | 2,200             | 1,446              | 5,198              | >10,000          | 1,735            | 2,639            | 3,298         |
| 41 | *                 | *                 | *                 | *                 | 771                | 861                | 6,041            | *                | *                | >10,000       |
| 42 | *                 | *                 | *                 | *                 | 567.5 <sup>a</sup> | *                  | 3,330            | *                | *                | *             |
| 37 | *                 | *                 | *                 | *                 | *                  | 3,840 <sup>b</sup> | *                | *                | *                | *             |
| 38 | *                 | *                 | *                 | *                 | *                  | *                  | 1,800            | *                | *                | *             |

| ID | $\alpha_{1B}$ | $\alpha_{1D}$ | $\alpha_{2A}$ | $\alpha_{2B}$ | $\alpha_{2C}$ | $\beta_1$ | $\beta_2$ | $\beta_3$ | $\delta$ | $\kappa$             | $\mu$ |
|----|---------------|---------------|---------------|---------------|---------------|-----------|-----------|-----------|----------|----------------------|-------|
| 9  | >10,000       | >10,000       | 30            | 1,049         | 707           | 5,353     | >10,000   | >10,000   | >10,000  | >10,000              | 6,937 |
| 22 | *             | *             | 281           | *             | 683           | *         | *         | *         | *        | *                    | *     |
| 17 | >10,000       | 3,976         | 231           | 2,304         | 751           | 5,022     | >10,000   | >10,000   | >10,000  | >10,000              | 4,468 |
| 30 | *             | *             | 621           | *             | 1,697         | *         | *         | *         | *        | 5,366.5 <sup>b</sup> | *     |
| 15 | >10,000       | 1,793         | 526           | 961           | 345           | 7,574     | >10,000   | >10,000   | >10,000  | 6,077                | 819   |
| 28 | 2,136         | 3,505         | 1,152         | >10,000       | 305           | >10,000   | >10,000   | 5,068     | 3,556    | 4,291                | 3,657 |
| 16 | 7,349         | >10,000       | 346           | 1,346         | 580           | >10,000   | >10,000   | >10,000   | >10,000  | >10,000              | 5,346 |
| 29 | >10,000       | 4,442         | 1,633         | 2,519         | 856           | >10,000   | >10,000   | 3,956     | >10,000  | >10,000              | 5,379 |
| 41 | >10,000       | *             | 1,571         | 2,787         | 82            | *         | *         | *         | *        | >10,000              | *     |
| 42 | *             | *             | 2,627         | 1,048         | 473           | *         | *         | *         | *        | 2,031                | *     |
| 37 | *             | >10,000       | 1,243         | 1,043         | 178           | *         | *         | *         | *        | *                    | *     |
| 38 | *             | *             | *             | 2,453         | >10,000       | *         | *         | *         | *        | >10,000              | *     |

| ID | DAT | NET | SERT | D <sub>1</sub> | D <sub>2</sub> | D <sub>3</sub> | D <sub>4</sub> | D <sub>5</sub> | H <sub>1</sub> | H <sub>2</sub> | H <sub>3</sub> |
|----|-----|-----|------|----------------|----------------|----------------|----------------|----------------|----------------|----------------|----------------|
|----|-----|-----|------|----------------|----------------|----------------|----------------|----------------|----------------|----------------|----------------|

|    |       |       |       |         |       |         |         |       |       |         |       |
|----|-------|-------|-------|---------|-------|---------|---------|-------|-------|---------|-------|
| 9  | 990   | 5,424 | 6,042 | *       | *     | 1,515   | 1,205   | *     | *     | 1,830   | *     |
| 22 | 1,102 | *     | *     | 3,075   | 3,979 | 756     | *       | *     | *     | 1,052   | 1,582 |
| 17 | 1,581 | 3,291 | 2,570 | >10,000 | 8,519 | *       | *       | *     | *     | *       | *     |
| 30 | 1,470 | 1,375 | *     | 2,175   | *     | *       | *       | *     | *     | *       | *     |
| 15 | 2,541 | 3,107 | 2,755 | 7,978   | 4,345 | 444     | >10,000 | 7,951 | 465   | 7,630   | 902   |
| 28 | 1,354 | 1,418 | 4,017 | 2,307   | 6,249 | 1,671   | >10,000 | 2,853 | 2,737 | >10,000 | 616   |
| 16 | 5,729 | 1,479 | 2,480 | 6,534   | 8,316 | >10,000 | >10,000 | 6,093 | 1,278 | 2,107   | 5,516 |
| 29 | 3,182 | 881   | 1,387 | >10,000 | 6,866 | 2,535   | 2,875   | 7,023 | 777   | 1,831   | 3,172 |
| 41 | *     | *     | 49    | *       | 8,732 | *       | 227     | *     | 5,188 | 423     | *     |
| 42 | 2,345 | 232   | *     | *       | *     | *       | *       | *     | *     | *       | *     |
| 37 | *     | *     | 471   | *       | *     | *       | *       | *     | *     | 5,112   | *     |
| 38 | *     | *     | *     | *       | *     | *       | *       | *     | *     | *       | *     |

| ID | H <sub>4</sub> | M <sub>1</sub> | M <sub>2</sub> | M <sub>3</sub> | M <sub>4</sub> | M <sub>5</sub> |
|----|----------------|----------------|----------------|----------------|----------------|----------------|
| 9  | 85             | *              | *              | *              | *              | *              |
| 22 | 707            | 3,536          | *              | *              | 3,908          | 4,444          |
| 17 | >10,000        | *              | *              | *              | *              | *              |
| 30 | *              | >10,000        | *              | *              | *              | *              |
| 15 | >10,000        | 1,623          | 1,920          | 1,912          | 1,160          | 1,061          |
| 28 | 5,232          | >10,000        | 1,500          | 1,598          | 970            | 853            |
| 16 | >10,000        | 5,698          | >10,000        | 4,557          | 5,014          | 5,792          |
| 29 | >10,000        | >10,000        | >10,000        | 1,562          | 3,139          | 1,366          |
| 41 | ND             | *              | *              | >10,000        | *              | *              |
| 42 | *              | *              | *              | *              | *              | *              |
| 37 | ND             | 1,274          | *              | *              | *              | *              |
| 38 | ND             | *              | *              | *              | 5,581          | *              |

\* < 50% inhibition of radioligand binding at 10  $\mu$ M.

<sup>a</sup> Average of 2 or more  $K_i$  determinations

ND Not determined
